# Supplementary material for: Genetically modified pigs with CD163 point mutation are resistant to HP-PRRSV infection
Source: PubMed Central journal article supplement — Zool Res. 2024 Jul 18;45(4):833–44. doi: 10.24272/j.issn.2095-8137.2024.090 (PMC11298667; doi:10.24272/j.issn.2095-8137.2024.090), 2024-07-18
Supplement: zr-45-833-S1.pdf [file zr-45-833-S1.pdf]

## Supplementary Materials

### Genetically modified pigs with CD163 point mutation are resistant to HP-PRRSV infection

Ying Liu<sup>1,#</sup>, Lin Yang<sup>1,#</sup>, Hong-Yong Xiang<sup>1,#</sup>, Ming Niu<sup>1</sup>, Jia-Cheng Deng<sup>1</sup>, Xue-Yuan Li<sup>1</sup>, Wen-Jie Hao<sup>1,2</sup>, Hong-Sheng Ou-Yang<sup>1,2,3</sup>, Tong-Yu Liu<sup>1</sup>, Xiao-Chun Tang<sup>1</sup>, Da-Xin Pang<sup>1,2,3,\*</sup>, Hong-Ming Yuan<sup>1,\*</sup>

1. State Key Laboratory for Diagnosis and Treatment of Severe Zoonotic Infectious Diseases, Animal Genome Editing Technology Innovation Center, College of Animal Sciences, Jilin University, Changchun, Jilin 130062, China
2. Chifeng Best Genetics Technology Co., Ltd., Chifeng, Nei Mongol 024000, China
3. Chongqing Jitang Biotechnology Research Institute Co., Ltd., Chongqing 400015, China

#Authors contributed equally to this work

\*Corresponding authors, E-mail: [pdx@jlu.edu.cn](mailto:pdx@jlu.edu.cn); [yuanhongming@jlu.edu.cn](mailto:yuanhongming@jlu.edu.cn)

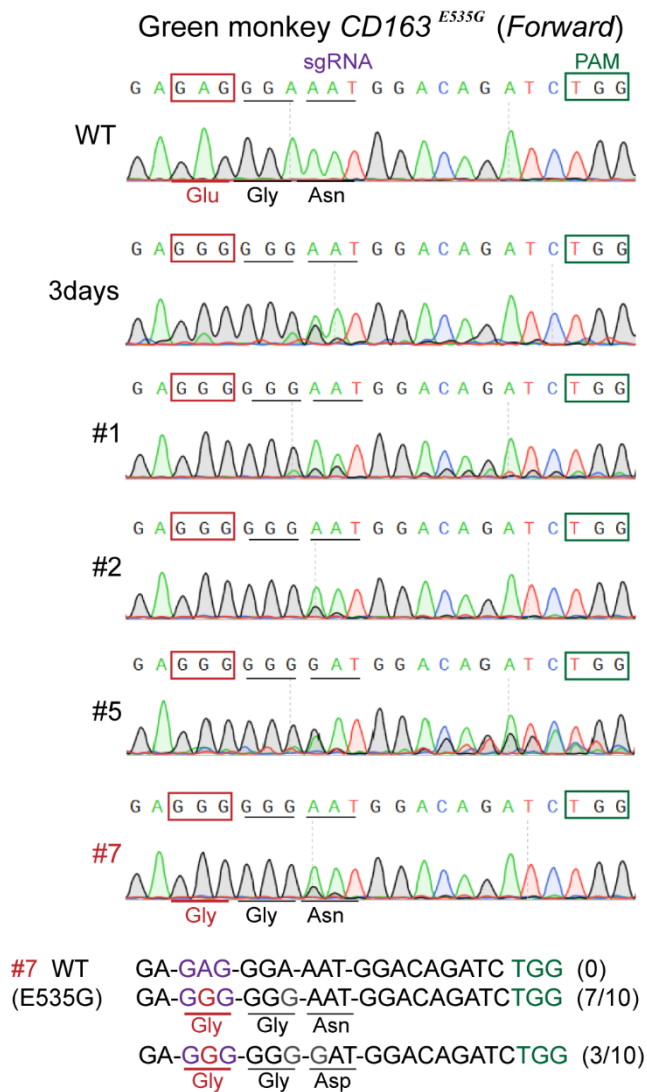

**Supplementary Figure S1. Sanger sequencing results for efficiency analysis of sgRNA target to E535G and single cell clone selection of E535G cells**

The E535G sgRNA and NG-ABE8e single-base editing plasmid were co-introduced into Marc145 cell line by electroporation and sgRNA efficiency was verified using specific primers mF and mR as shown in Supplementary Table S1 for PCR amplification and sanger sequencing, clone-#7 was selected for subsequent validation.

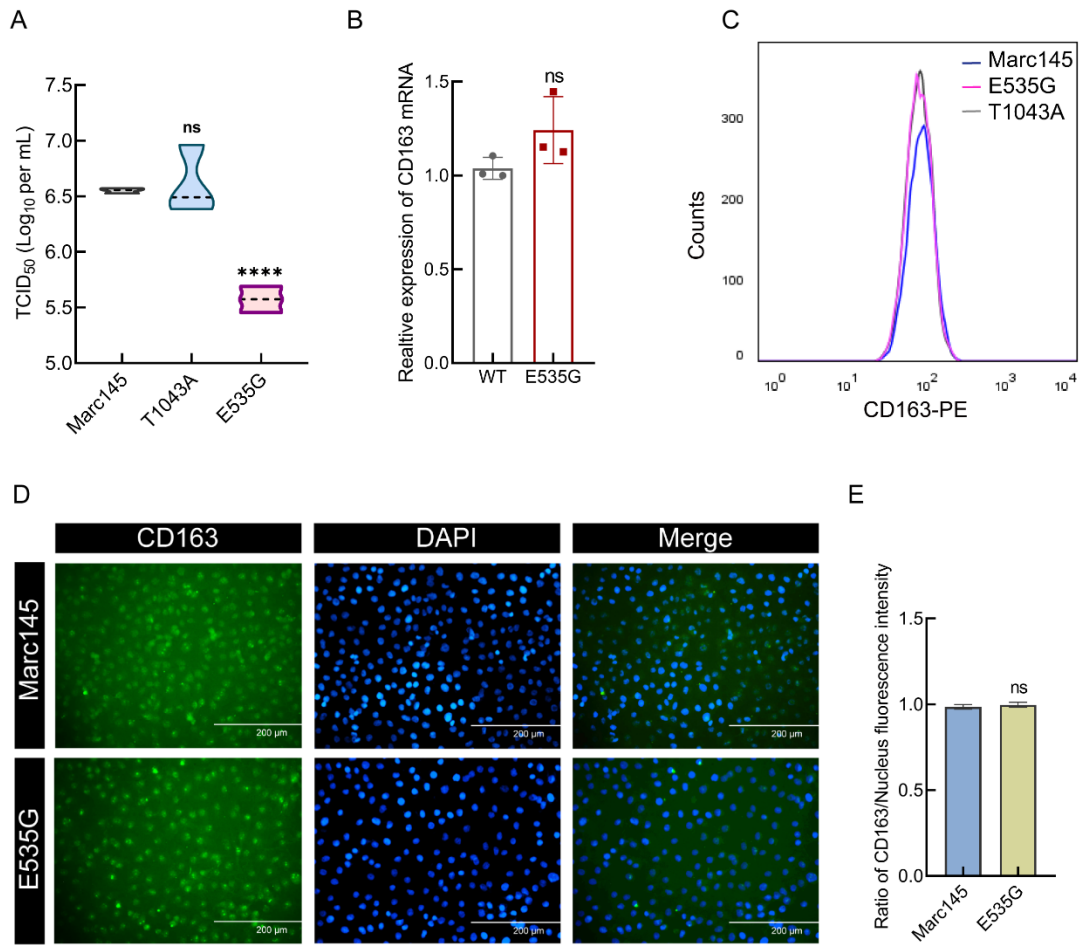

**Supplementary Figure S2. CD163 expression levels in WT or E535G Marc145 cells after PRRSV infection**

**A:** WT, T1043A, and E535G cells were inoculated with JXA1 and 48 hours later virus titers were determined by TCID<sub>50</sub> assay, n=3. **B–D:** Expression of CD163 in wild-type or E535G Marc145 cells were measured using qPCR (B) and protein were indicated by FACS (C) and IFA (D). **E:** Fluorescence intensity in (D) was quantified by ImageJ analysis.

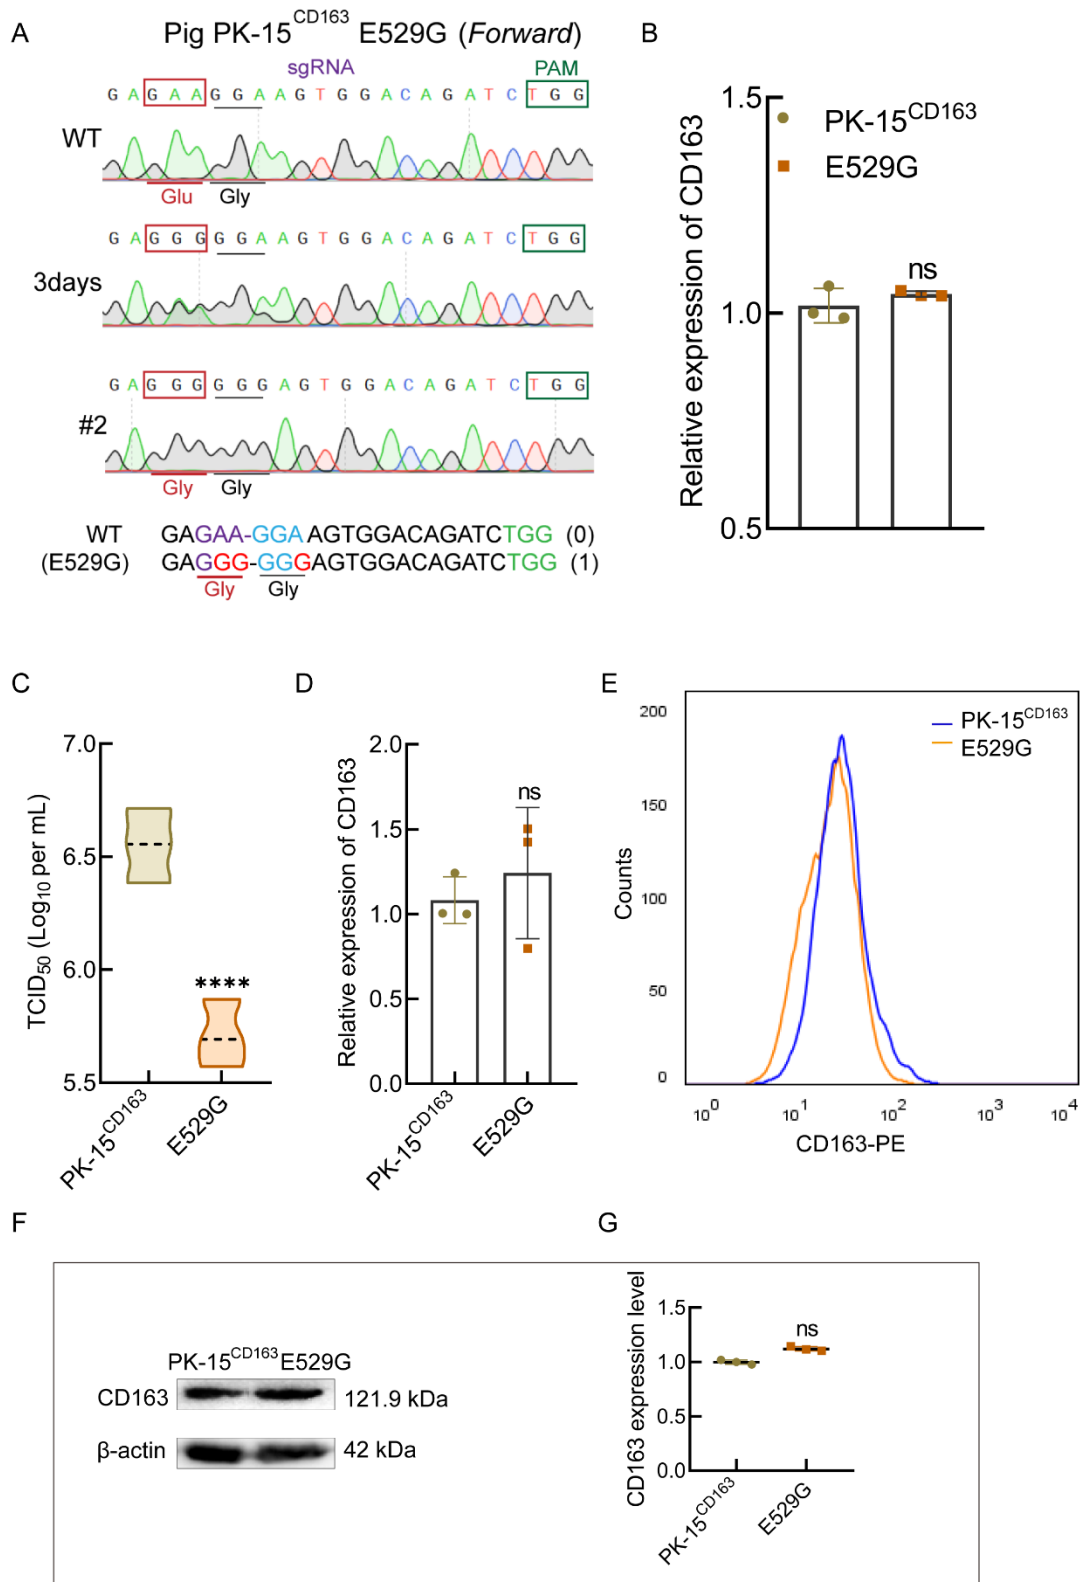

**Supplementary Figure S3. Identification of PK-15<sup>CD163</sup>-E529G cells as well as CD163 expression states between PK-15<sup>CD163</sup> and PK-15<sup>CD163</sup>-E529G cells with PRRSV inoculated or not**

**A:** Sanger sequencing results for efficiency analysis of sgRNA target to pE529G and selection of PK-15<sup>CD163</sup>-E529G cell clone using specific primers pF and pR shown in

Supplementary Table S1. **B:** Relative expression of CD163 mRNA in PK-15<sup>CD163</sup> and PK-15<sup>CD163</sup>-E529G cells were measured by qPCR using primers pCD163-F/R. **C:** PK-15<sup>CD163</sup> and PK-15<sup>CD163</sup>-E529G cells were inoculated with JXA1 and 48 hours later virus titers were determined by TCID<sub>50</sub> assay, n=3. **D:** Relative expression of CD163 mRNA in PK-15<sup>CD163</sup> and PK-15<sup>CD163</sup>-E529G cells were tested by qPCR 48h post infection of GD strain at MOI=0.1. **E-G:** Expression of CD163 in PK-15<sup>CD163</sup> and PK-15<sup>CD163</sup>-E529G cells were further indicated by FACS (E) and WB (F). ImageJ analysis of WB results were shown in (G).

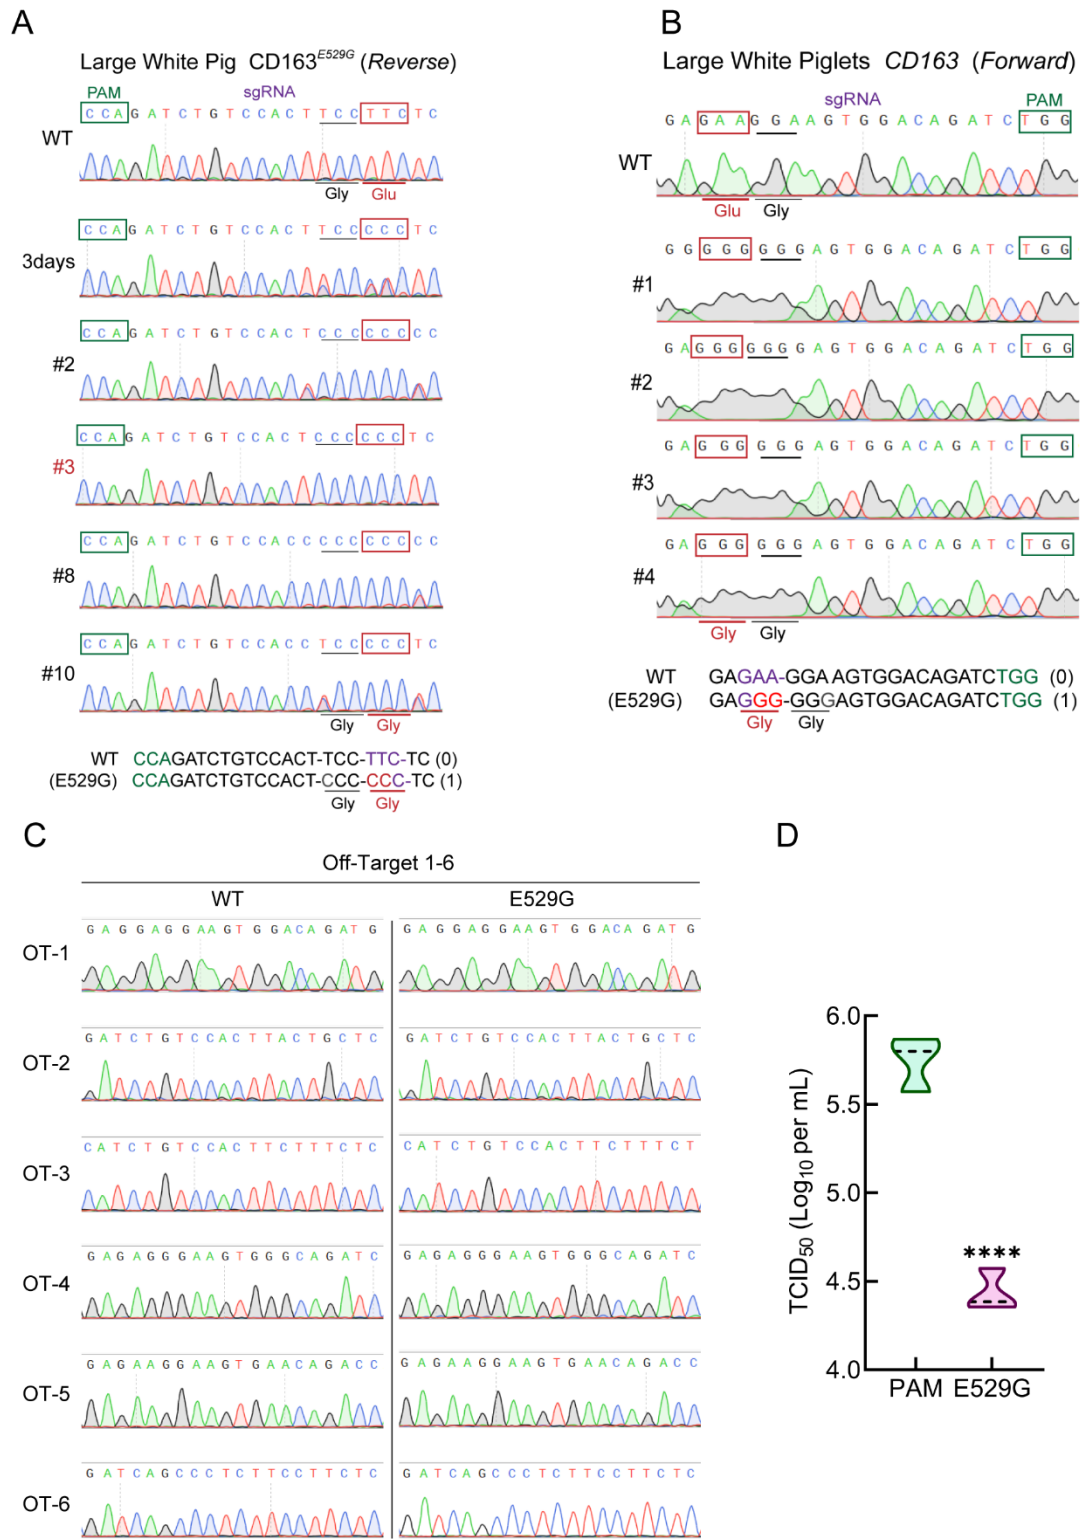

**Supplementary Figure S4. Genotype identification of E529G PFFs as well as F0 piglets**

**A:** Sanger sequencing results for efficiency analysis of sgRNA target to pCD163-E529G and selection of PFFs-E529G cell clone by specific primers pF and pR shown in Supplementary Table S1. **B:** Genotype identification of F0 piglets by Sanger

sequencing. **C:** The potential off-target sites (Supplementary Table S5 ) were predicted and analyzed by sanger sequencing using primers in Supplementary Table S6. **D:** Virus titers of WT and E529G PAMs in Figure 4H were determined by TCID<sub>50</sub> assay, n=3.

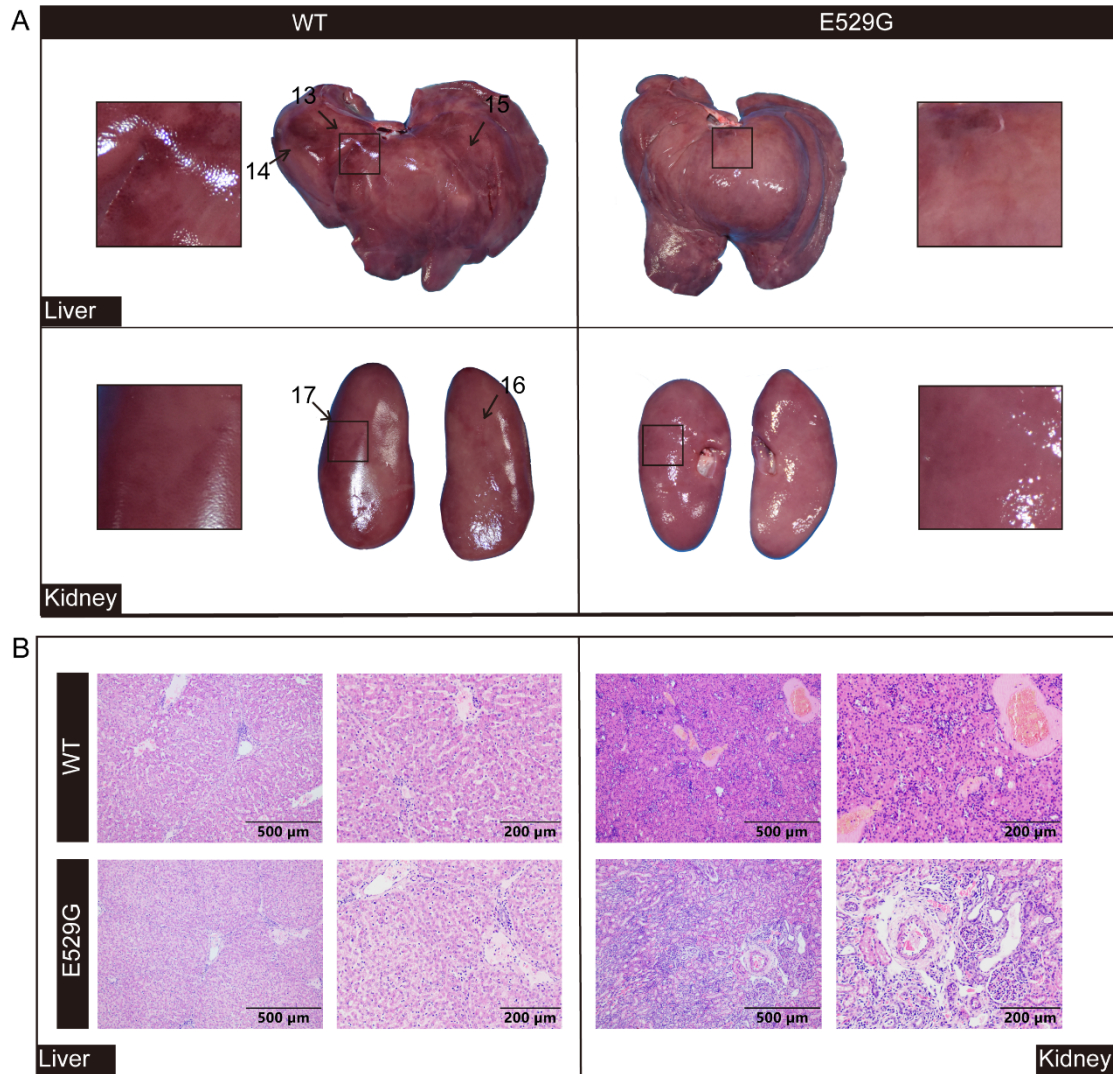

**Supplementary Figure S5. Supplement materials of lesions in tissues and organs from viral challenged pigs**

**A:** Macroscopic observation of tissue damage of liver (above) and kidney (below) from WT (left) and E529G (right) pigs. **B:** H&E staining of liver (above) and kidney (below), 10×magnification is on the left and corresponding 20×magnification is on the right.

**Supplementary Table S1.** Sequence of primers in this study. (DOCX)

| <b>Primer name</b> | <b>sequence</b>              |
|--------------------|------------------------------|
| mGAPDH-F           | CACCAGGGCTGCTTTTAACTC        |
| mGAPDH-R           | TGGTGAAGACGCCAGTGGAC         |
| pGAPDH-F           | CCTTCCGTGTCCCTACTGCCAAC      |
| pGAPDH-R           | GACGCCTGCTTCACCACCTTCT       |
| mCD163-F           | ATGGGGTGGACTTACCTGTG         |
| mCD163-R           | GTCCATTTCCCTCTCCAAAG         |
| pCD163-F           | ATGGACACGAGTCTGCTCTC         |
| pCD163-R           | TGAATTTCCACCTCCACTGT         |
| PRRSV-ORF7-F       | AAACCAGTCCAGAGGCAAGG         |
| PRRSV-ORF7-R       | GCAAATAAACTCCACAGTGTA        |
| mF                 | TGAGACATGTCCATTGAGCAG        |
| mR                 | CTCAGTCCCAGTGCAGTGAA         |
| pF                 | GGCATTGAGAAAGTCCAATTTTC      |
| pR                 | AGGACCCAAGAATGTTGAGCTCC      |
| CD163-CDS-F        | TCTAGAATGGACAAACTCAGAATGGTGC |
| CD163-CDS-R        | ACCGGTTTGTACTTCAGAGTGGTCTCC  |

**Supplementary Table S2.** Blastocyst development rate of reconstructed embryos *in vitro*. (DOCX)

| <b>SCNT<br/>(n = 3)</b> | <b>Donor Cell</b>         | <b>Numbers of<br/>oocytes</b> | <b>Numbers of<br/>blastocyst</b> | <b>Blastocyst<br/>Rate</b> |
|-------------------------|---------------------------|-------------------------------|----------------------------------|----------------------------|
| <b>1</b>                | <b>Wild type<br/>PFFs</b> | 200                           | 31                               | 18.2%                      |
|                         | <b>E529G PFFs</b>         | 200                           | 29                               | 17.7%                      |
| <b>2</b>                | <b>Wild type<br/>PFFs</b> | 200                           | 30                               | 17.8%                      |
|                         | <b>E529G PFFs</b>         | 200                           | 31                               | 19.0%                      |
| <b>3</b>                | <b>Wild type<br/>PFFs</b> | 200                           | 27                               | 16.3%                      |
|                         | <b>E529G PFFs</b>         | 200                           | 33                               | 19.3%                      |

**Supplementary Table S3.** Whole-blood-count results for E529G (animals #1 to #3) and wild-type (animals WT-1 to 3) piglets at 2 weeks of age. (DOCX)

| <b>Value for animal</b> |
|-------------------------|
|-------------------------|



| Indicator                                  | WT-1  | WT-2  | WT-3  | #1    | #2    | #3    | Reference value (range) |
|--------------------------------------------|-------|-------|-------|-------|-------|-------|-------------------------|
| <b>WBC count (10<sup>9</sup>/L)</b>        | 6.06  | 6.12  | 6.09  | 13.91 | 13.66 | 14    | 10.00-22.00             |
| <b>Neutrophil count (10<sup>9</sup>/L)</b> | 3.35  | 3.41  | 3.32  | 11.84 | 11.25 | 11.63 | 2.00-15.00              |
| <b>% neutrophils</b>                       | 55.2  | 55.7  | 54.4  | 85.1  | 82.3  | 83    | 20.0-70.0               |
| <b>Lymphocyte count (10<sup>9</sup>/L)</b> | 2.09  | 2.07  | 2.14  | 0.87  | 0.9   | 0.88  | 0.8-18.70               |
| <b>% lymphocytes</b>                       | 34.4  | 33.7  | 35.1  | 34.3  | 36.1  | 35.8  | 35.0-75.0               |
| <b>Monocyte count (10<sup>9</sup>/L)</b>   | 0.54  | 0.57  | 0.54  | 1.1   | 1.44  | 1.43  | 0.20-2.20               |
| <b>% monocytes</b>                         | 9     | 9.4   | 8.8   | 7.9   | 10.5  | 10.2  | 0.0-10.0                |
| <b>Eosinophil count (10<sup>9</sup>/L)</b> | 0.06  | 0.06  | 0.07  | 0.02  | 0.01  | 0.01  | 0-2.00                  |
| <b>% eosinophils</b>                       | 1     | 1     | 1.3   | 0.2   | 0.1   | 0.1   | 0.0-15.0                |
| <b>Basophil count</b>                      | 0.02  | 0.01  | 0.02  | 0.08  | 0.06  | 0.05  | 0.00-0.30               |
| <b>% basophils</b>                         | 0.4   | 0.2   | 0.4   | 0.6   | 0.5   | 0.4   | 0.0-4.0                 |
| <b>RBC count (10<sup>12</sup>/L)</b>       | 6.93  | 6.9   | 6.87  | 3.98  | 4     | 4.02  | 5.00-9.50               |
| <b>% HCT (hematokrit)</b>                  | 39.5  | 39.5  | 39.2  | 27.8  | 27.8  | 28    | 32.0-50.0               |
| <b>MCV (fl)</b>                            | 57    | 57.1  | 57.1  | 69.8  | 69.6  | 69.7  | 50.0-68.0               |
| <b>Hb level (g/dl)</b>                     | 133   | 135   | 134   | 85    | 85    | 88    | 90-180                  |
| <b>MCH (fl)</b>                            | 19.2  | 19.6  | 19.5  | 21.4  | 21.2  | 21.8  | 16.0-22.0               |
| <b>MCHC (g/dl)</b>                         | 338   | 342   | 341   | 307   | 304   | 313   | 290-380                 |
| <b>RDW (fl)</b>                            | 38.5  | 38.3  | 38.4  | 55.6  | 55    | 54.9  | 0.1-99.9                |
| <b>No. of platelets (10<sup>9</sup>/L)</b> | 290   | 290   | 301   | 672   | 689   | 695   | 120-720                 |
| <b>MPV (fl)</b>                            | 10.4  | 10.4  | 10.4  | 10.5  | 10.6  | 10.6  | 3.8-14.1                |
| <b>PDW (fl)</b>                            | 18.7  | 18.7  | 18.5  | 18.5  | 18.9  | 18.9  | 0.1-30.0                |
| <b>%PCT</b>                                | 0.303 | 0.301 | 0.312 | 0.703 | 0.729 | 0.733 | 0.010-9.990             |

WBC, white blood cell; RBC, red blood cell; PCV, packed cell volume; Hb, hemoglobin; HC, Hematocrit; MCV, mean corpuscular volume; MCH, Mean Corpuscular Hemoglobin; MCHC, mean corpuscular hemoglobin concentration; RDW, red cell distribution width; MPV, Mean Platelet Volume; PDW, platelet distribution width; PCT, Thrombocytosis.

**Supplementary Table S4.** Standard for scoring of clinical signs. (DOCX)

| Clinical signs | Scores | Clinical signs       | Scores |
|----------------|--------|----------------------|--------|
| Normal         | 0      | Rubefaction          | 2      |
| Poor appetite  | 1      | Dyspnea              | 2      |
| Lethargy       | 1      | Skin rash            | 2      |
| Conjunctivitis | 1      | Coarse hair          | 2      |
| Red skin       | 1      | Cough                | 2      |
| Sneezing       | 1      | Asthma               | 4      |
| Dry feces      | 1      | Lameness             | 4      |
| Diarrhea       | 1      | Blue ears            | 4      |
| Emaciation     | 2      | Stopping feed intake | 4      |

**Supplementary Table S5.** Off-target ID of E529G pigs. (DOCX)

| <b>Off-target ID</b> | <b>Off-target Sequence</b> | <b>mismatch<br/>Pos</b> | <b>mismatch<br/>Count</b> |
|----------------------|----------------------------|-------------------------|---------------------------|
| 1                    | GAGGAGGAAGTGGACAGATGAAG    | ...*.....*              | 2                         |
| 2                    | GAGCAGTAAGTGGACAGATCTGA    | ...*.....*              | 2                         |
| 3                    | GAGAAAGAAGTGGACAGATGTGG    | ....*.....*             | 2                         |
| 4                    | GAGAGGGAAGTGGGCAGATCCAG    | ....*.....*             | 2                         |
| 5                    | GAGAAGGAAGTGAACAGACCAGG    | .....*.....*            | 2                         |
| 6                    | GAGAAGGAAGAGGGCTGATCGGG    | .....*.....*            | 3                         |

**Supplementary Table S6.** Off-target primers. (DOCX)

| <b>Off-Target-Primer name</b> | <b>sequence</b>        |
|-------------------------------|------------------------|
| OT-1-F                        | ATGGGAAAGGGAGCAGATTT   |
| OT-1-R                        | ACCCAGCACTCTGCTTTTGT   |
| OT-2-F                        | CCAGATTGCCAGCCTTTATGC  |
| OT-2-R                        | GTGAAGGGACTGAGAGTGTTGT |
| OT-3-F                        | AGCATGGAGACCAGCATAGC   |
| OT-3-R                        | TCTTTTCCCACCCCTTTCCC   |
| OT-4-F                        | CTGAGAGGAGGGGGATCTGG   |
| OT-4-R                        | ATTCCATGGATGGGTGTGCC   |
| OT-5-F                        | CGTCCTCTCCCTTCCCTATC   |
| OT-5-R                        | GAACTCGGGAGCCTTTCTCT   |
| OT-6-F                        | GTGTAACCCTCCTTCGTCGG   |
| OT-6-R                        | CCCTGTGGGTTGTGGGAATG   |
